# Supplementary material
Source: PubMed Central journal article supplement (PMC5535040)
Supplement: 10.1074_M117.777581_jbc.M117.777581-1.pdf [file 10.1074_M117.777581_jbc.M117.777581-1.pdf]

**SUPPLEMENTAL MATERIAL (JBC/2017/777581)**

**Wnt3a Induces the Expression of Acetylcholinesterase in Osteoblast via Runx2  
Transcription Factor**

Miranda L. Xu, Cathy W. C. Bi, Etta Y. L. Liu, Tina T. X. Dong, Karl W. K. Tsim

**Supplemental Figures and Legends ..... Page S-2**

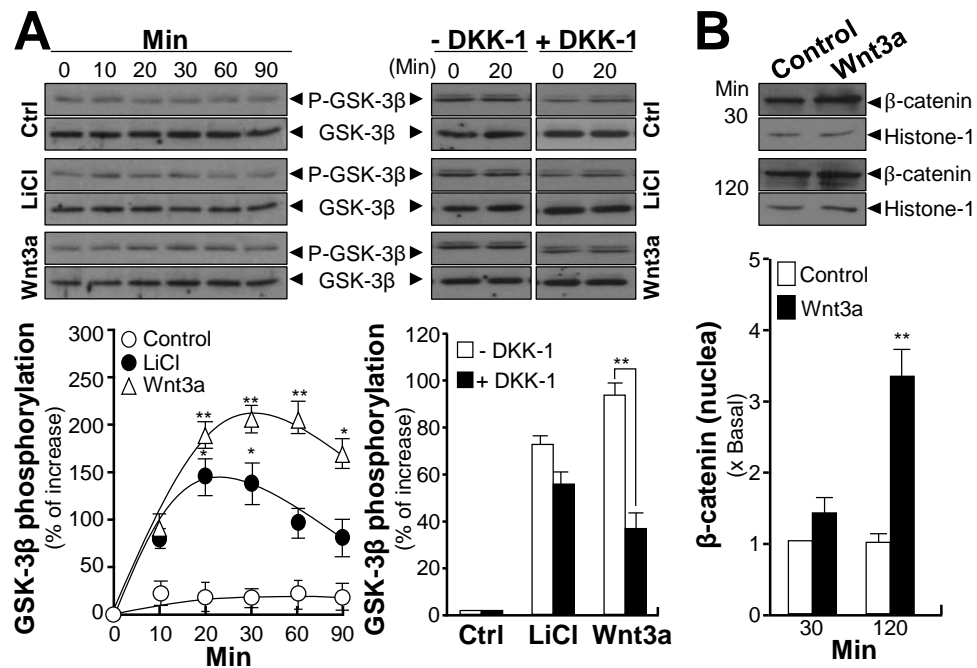

**SUPPLEMENTAL FIGURE.** Wnt3a and LiCl activate Wnt/ $\beta$ -catenin signaling components in cultured osteoblasts. (A) Upper left panel: cultured osteoblasts were treated with Wnt3a (200 ng/ml) and LiCl (10 mM) for 90 min. Upper right panel: Cultured osteoblasts were treated with Wnt3a (200 ng/ml) and LiCl (10 mM) for 90 min, with or without pre-treatment of DKK-1 (100 ng/ml) for 2 hours. GSK-3 $\beta$  or their phosphorylated forms (P-GSK-3 $\beta$ ), were revealed (both at ~47 kDa) by specific antibodies. Lower panel: the quantitation from the blots was shown by a densitometer. (B) Cultured osteoblasts were treated with or without Wnt3a (200 ng/ml) for 30 min and 2 hours. Nuclear fractions were separated and collected for western blot analysis. The levels of  $\beta$ -catenin (~95 kDa) and histone-1 (a nuclear marker at ~17 kDa) were revealed by specific antibodies. The quantitation from the blots was shown by a densitometer (lower panel). Values are expressed as the fold of increase to basal reading, and are in means  $\pm$  SEM,  $n = 3$ , \*,  $p < 0.05$ ; \*\*,  $p < 0.01$ .

Xu et al., 2017

Supplemental Figure
